# Supplementary material
Source: Springer Nature journal article supplement (https://www.springermedizin.de/resource/supplementary/12931_2013_1472_MOESM4_ESM.pdf/9426242)

A.

V5/ $\alpha$ -SMA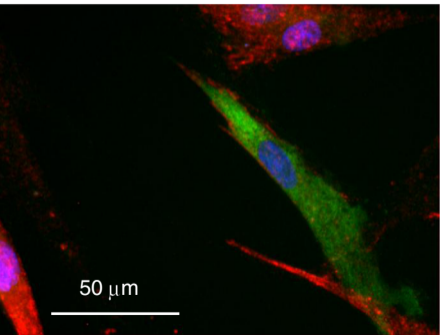

B.

V5/phalloidin

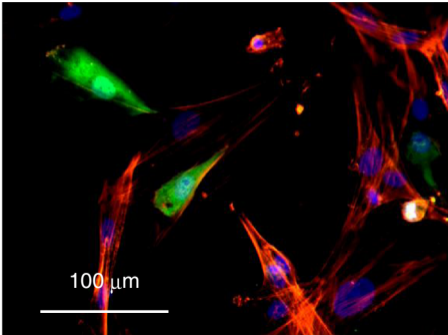

Supplement: MOESM4 [file 9426242]
